# Supplementary material for: Association between iscR-based phylogeny, serovars and potential virulence markers of Haemophilus parasuis
Source: PeerJ. 2019 May 14;7:e6950. doi: 10.7717/peerj.6950 (PMC6524630; doi:10.7717/peerj.6950)
Supplement: Supplemental Information 2 — Names, serovar, potential virulence markers, isolation sites of isolates are shown in this table. [file peerj-07-6950-s002.xlsx]

## Sheet: Fig 3
Fig 3A									Fig 3B
	CladeⅠ	CladeⅡ								CladeⅠ	CladeⅡ
Systemic	41	18							Brain	1	1
Respiratory	49	37							Pleural effusion	9	7
Nasal	2	1							Pericardial effusion	15	1
									Seroperitoneum	4	3
									Spleen	6	3
									Joint	6	3
												F

## Sheet: Fig 4
Fig 4A
		CladeⅠ	CladeⅡ
	S1	0	8
	S2	1	4
	S4	24	4
	S5	17	3
	S6	1	0
	S7	0	10
	S8	0	1
	S9	0	1
	S10	0	2
	S11	2	0
	S12	16	12
	S13	15	9
	S14	12	2
	Su	4	0
Fig 4B
	Serovar	Systemic	Respiratory	Nasal
	S1	3	4	1
	S2	3	2	0
	S4	10	18	0
	S5	7	12	1
	S6	1	0	0
	S7	2	8	0
	S8	1	0	0
	S9	0	1	0
	S10	0	2	0
	S11	0	1	1
	S12	14	14	0
	S13	13	11	0
	S14	2	12	0
	Su	3	1	0

## Sheet: Fig 5
	HAPS_0254 (B14)	HAPS_0254 (D45)	nhaC	fhuA	hhdA	hhdB	hsdS	hsdR	HPS_21058	HPS_21059
S1	0.125	0.125	0.125	0.125	0.125	0.125	0	0.25	0.375	0.125
S2	0	0.4	0.2	0	0.4	0.2	0	0	1	0.6
S4	0.892857	0.928571	0.857143	0.392857	0.857143	0.821429	0.357143	0.5	0.107143	0.0357143
S5	1	1	1	1	0.95	1	0.4	0.5	0.05	0.45
S7	0.3	0.4	0.2	0.1	0.3	0.3	0.2	0.3	0.5	0.1
S12	0.857143	0.892857	0.964286	0.5	0.964286	0.964286	0.642857	0.857143	0.0714286	0.0357143
S13	0.791667	0.791667	0.833333	0.291667	0.75	0.833333	0.458333	0.583333	0.0416667	0.0416667
S14	1	1	1	0.214286	1	1	0.928571	0.928571	0.0714286	0.0714286

## Sheet: Fig 6
	average No.of PVMs	SD
S1	1.5	2.14
S2	2.8	1.92
S7	2.7	3.06
S4	5.75	1.71
S5	7.35	1.14
S12	6.75	1.48
S13	5.42	2.3
S14	7.21	0.58

## Sheet: Fig 7 and Fig 8
ID	serovar	HAPS_0254 (B14)	HAPS_0254 (D45)	nhaC	fhuA	hhdA	hhdB	hsdS	hsdR	HPS_21058	HPS_21059	Isolation site
ZJ1413-S1	1	-	-	-	-	-	-	-	-	-	-	nose
ZJ1009-S1	1	-	-	-	-	-	-	-	-	-	-	Lung
ZJ1212-S1	1	-	-	-	-	-	-	-	-	-	-	Pleural effusion
ZJ1421-S1	1	-	-	-	-	-	-	-	-	+	-	Pleural effusion
ZJ1510-S1	1	+	+	+	+	+	+	-	-	-	-	Pleural effusion
ZJ16153-S1	1	-	-	-	-	-	-	-	-	-	-	Lung
ZJ16291-S1	1	-	-	-	-	-	-	-	+	+	-	Lung
ZJ1620-S1	1	-	-	-	-	-	-	-	+	+	+	Lung
ZJ1513-S2	2	-	-	-	-	-	-	-	-	+	+	Seroperitoneum
ZJ1608-S2	2	-	-	-	-	-	-	-	-	+	+	Seroperitoneum
ZJ10152-S2	2	-	+	+	-	+	+	-	-	+	+	Spleen
ZJ1010-S2	2	-	-	-	-	-	-	-	-	+	-	Lung
ZJ10022-S2	2	-	+	-	-	+	-	-	-	+	-	Lung
ZJ1211-S4	4	+	+	+	-	-	+	-	+	-	-	Seroperitoneum
ZJ1209-S4	4	-	-	-	-	-	-	-	-	+	-	Joint
ZJ0901-S4	4	+	+	+	+	+	+	-	-	-	-	Spleen
ZJ1008-S4	4	+	+	-	-	+	-	-	-	-	-	Lung
ZJ1206-S4	4	+	+	+	-	-	+	-	-	-	-	Pericardial effusion
ZJ1112-S4	4	+	+	+	-	+	-	-	+	-	-	Pericardial effusion
ZJ1103-S4	4	+	+	+	+	+	+	-	+	-	-	Pericardial effusion
ZJ1625-S4	4	+	+	+	-	+	+	+	+	-	-	Pericardial effusion
ZJ1102-S4	4	-	+	-	-	+	-	-	+	+	-	Pleural effusion
ZJ1210-S4	4	+	+	+	+	+	+	-	-	-	-	Pleural effusion
ZJ1106-S4	4	+	+	+	-	+	+	+	+	-	-	Pleural effusion
ZJ1604-S4	4	-	-	-	-	-	-	-	-	+	-	Lung
ZJ0902-S4	4	+	+	+	+	+	+	-	-	-	-	Lung
ZJ1016-S4	4	+	+	+	+	+	+	-	-	-	-	Lung
ZJ1411-S4	4	+	+	+	+	+	+	-	-	-	-	Lung
ZJ1416-S4	4	+	+	+	+	+	+	-	-	-	-	Lung
ZJ1417-S4	4	+	+	+	+	+	+	-	-	-	-	Lung
ZJ1512-S4	4	+	+	+	+	+	+	-	-	-	-	Lung
ZJ1518-S4	4	+	+	+	+	+	+	-	-	-	-	Lung
ZJ1408-S4	4	+	+	+	+	+	+	-	-	-	+	Lung
ZJ1313-S4	4	+	+	+	-	+	+	+	+	-	-	Lung
ZJ1410-S4	4	+	+	+	-	+	+	+	+	-	-	Lung
ZJ15142-S4	4	+	+	+	-	+	+	+	+	-	-	Lung
ZJ1610-S4	4	+	+	+	-	+	+	+	+	-	-	Lung
ZJ1612-S4	4	+	+	+	-	+	+	+	+	-	-	Lung
ZJ1622-S4	4	+	+	+	-	+	+	+	+	-	-	Lung
ZJ1626-S4	4	+	+	+	-	+	+	+	+	-	-	Lung
ZJ1627-S4	4	+	+	+	-	+	+	+	+	-	-	Lung
ZJ16151-S5	5	+	+	+	+	+	+	-	-	-	+	nose
ZJ1304-S5	5	+	+	+	+	+	+	-	+	-	-	Joint
ZJ1503-S5	5	+	+	+	+	+	+	+	+	-	-	Joint
ZJ1306-S5	5	+	+	+	+	+	+	-	-	-	-	Spleen
ZJ1020-S5	5	+	+	+	+	+	+	+	+	+	+	Spleen
ZJ1203-S5	5	+	+	+	+	-	+	-	+	-	-	Pericardial effusion
ZJ1621-S5	5	+	+	+	+	+	+	-	-	-	-	Pericardial effusion
ZJ1108-S5	5	+	+	+	+	+	+	+	+	-	-	Pericardial effusion
ZJ1011-S5	5	+	+	+	+	+	+	-	-	-	-	Lung
ZJ1415-S5	5	+	+	+	+	+	+	-	-	-	-	Lung
AH1628-S5	5	+	+	+	+	+	+	-	-	-	+	Lung
ZJ1012-S5	5	+	+	+	+	+	+	-	-	-	+	Lung
ZJ1508-S5	5	+	+	+	+	+	+	-	-	-	+	Lung
ZJ1511-S5	5	+	+	+	+	+	+	-	-	-	+	Lung
ZJ1607-S5	5	+	+	+	+	+	+	-	-	-	+	Lung
ZJ10031-S5	5	+	+	+	+	+	+	+	+	-	-	Lung
ZJ1406-S5	5	+	+	+	+	+	+	+	+	-	-	Lung
ZJ1509-S5	5	+	+	+	+	+	+	+	+	-	-	Lung
ZJ1403-S5	5	+	+	+	+	+	+	+	+	-	+	Lung
ZJ1616-S5	5	+	+	+	+	+	+	+	+	-	+	Lung
ZJ1101-S6	6	+	+	+	-	+	+	+	+	-	-	Pleural effusion
ZJ1307-S7	7	-	-	-	-	-	-	-	-	-	-	Seroperitoneum
ZJ1017-S7	7	-	-	-	-	-	-	-	-	-	-	Joint
ZJ1007-S7	7	+	+	-	-	+	+	+	+	-	-	Lung
ZJ16152-S7	7	-	-	-	-	-	-	-	-	-	-	Lung
AH1619-S7	7	-	-	-	-	-	-	-	-	+	-	Lung
ZJ1316-S7	7	-	-	-	-	-	-	-	-	+	-	Lung
ZJ14142-S7	7	-	-	-	-	-	-	-	-	+	+	Lung
ZJ1407-S7	7	+	+	-	-	-	-	-	+	-	-	Lung
ZJ1021-S7	7	-	+	+	-	+	+	-	-	+	-	Lung
ZJ1310-S7	7	+	+	+	+	+	+	+	+	+	-	Lung
ZJ1312-S8	8	-	-	-	-	-	-	-	-	-	-	Joint
ZJ1609-S9	9	-	-	-	-	-	-	-	-	-	-	Lung
ZJ1004-S10	10	+	+	+	-	+	-	+	+	-	-	Lung
ZJ1309S10	10	-	-	-	-	-	-	-	-	-	-	Lung
ZJ1614-S11	11	-	-	+	-	+	-	-	-	-	-	nose
ZJ1314-S11	11	-	-	+	-	+	+	-	+	-	-	Lung
ZJ1019-S12	12	+	+	+	+	+	+	+	+	+	-	Seroperitoneum
ZJ1404-S12	12	+	+	+	+	+	+	+	+	-	-	Joint
ZJ09041-S12	12	-	+	-	-	-	-	-	-	-	-	Spleen
ZJ1110-S12	12	+	+	+	-	+	+	-	+	-	-	Spleen
ZJ1515-S12	12	-	-	+	-	+	+	+	+	-	-	Spleen
ZJ1523-S12	12	+	+	+	-	+	+	+	+	-	-	Lung
ZJ1204-S12	12	+	+	+	-	+	+	-	+	-	-	Pericardial effusion
ZJ1617-S12	12	+	+	+	-	+	+	+	+	-	-	Pericardial effusion
ZJ1205-S12	12	+	+	+	+	+	+	+	+	-	-	Pericardial effusion
ZJ1522-S12	12	+	+	+	+	+	+	+	+	-	-	Pericardial effusion
ZJ1311-S12	12	+	+	+	+	+	+	-	+	-	-	Pleural effusion
ZJ1014-S12	12	+	+	+	+	+	+	-	+	+	-	Pleural effusion
ZJ1303-S12	12	-	-	+	+	+	+	+	+	-	-	Pleural effusion
ZJ1105-S12	12	+	+	+	-	+	+	+	+	-	-	Pleural effusion
ZJ1419-S12	12	+	+	+	-	+	+	+	+	-	-	Pleural effusion
ZJ1107-S12	12	+	+	+	-	+	+	-	+	-	-	Lung
ZJ1302-S12	12	+	+	+	+	+	+	-	-	-	-	Lung
ZJ1602-S12	12	+	+	+	+	+	+	-	-	-	-	Lung
ZJ1519-S12	12	+	+	+	+	+	+	-	+	-	-	Lung
ZJ09042-S12	12	+	+	+	+	+	+	-	-	-	+	Lung
ZJ1601-S12	12	-	-	+	-	+	+	+	+	-	-	Lung
ZJ0903-S12	12	+	+	+	-	+	+	+	+	-	-	Lung
ZJ1418-S12	12	+	+	+	-	+	+	+	+	-	-	Lung
ZJ1425-S12	12	+	+	+	-	+	+	+	+	-	-	Lung
ZJ1516-S12	12	+	+	+	-	+	+	+	+	-	-	Lung
JX1701-S12	12	+	+	+	+	+	+	+	+	-	-	Lung
ZJ1409-S12	12	+	+	+	+	+	+	+	+	-	-	Lung
ZJ16292-S12	12	+	+	+	+	+	+	+	+	-	-	Lung
ZJ1618-S13	13	+	+	+	+	+	+	-	-	-	-	Seroperitoneum
ZJ1001-S13	13	+	+	+	-	+	+	+	+	-	-	Joint
ZJ1315-S13	13	+	+	+	-	+	+	+	+	-	-	Joint
ZJ1422-S13	13	+	+	+	-	+	+	+	+	-	-	Joint
ZJ1405-S13	13	-	-	-	-	-	-	-	-	-	-	Brain
ZJ1018-S13	13	+	+	+	+	+	+	-	-	-	-	Brain
ZJ1506-S13	13	+	+	+	-	+	+	+	+	-	-	Lung
ZJ1109-S13	13	+	+	+	-	+	+	-	+	-	-	Pericardial effusion
ZJ1201-S13	13	+	+	+	+	+	+	-	-	-	-	Pericardial effusion
ZJ1507-S13	13	+	+	+	-	+	+	+	+	-	-	Pericardial effusion
ZJ1202-S13	13	+	+	+	-	-	+	-	-	-	-	Pleural effusion
ZJ1308-S13	13	+	+	+	-	-	+	-	+	-	-	Pleural effusion
ZJ1005-S13	13	+	+	+	+	+	+	-	+	-	-	Pleural effusion
ZJ10032-S13	13	+	+	+	-	+	+	+	+	-	-	Pleural effusion
ZJ1207-S13	13	-	-	-	-	-	-	-	-	-	-	Lung
ZJ1424-S13	13	-	-	-	-	-	-	-	-	+	-	Lung
ZJ1208-S13	13	+	+	+	+	+	+	-	-	-	-	Lung
ZJ1401-S13	13	+	+	+	+	+	+	-	-	-	-	Lung
ZJ1113-S13	13	+	+	+	+	+	+	-	-	-	+	Lung
ZJ1624-S13	13	-	-	-	-	-	-	+	+	-	-	Lung
ZJ14141-S13	13	-	-	+	-	+	+	+	+	-	-	Lung
ZJ1301-S13	13	+	+	+	-	+	+	+	+	-	-	Lung
ZJ1505-S13	13	+	+	+	-	+	+	+	+	-	-	Lung
ZJ1517-S13	13	+	+	+	-	+	+	+	+	-	-	Lung
ZJ1006-S14	14	+	+	+	-	+	+	+	+	-	-	Lung
ZJ1013-S14	14	+	+	+	-	+	+	+	+	-	-	Lung
ZJ1305-S14	14	+	+	+	-	+	+	+	+	-	-	Pericardial effusion
ZJ1611-S14	14	+	+	+	-	+	+	+	+	-	-	Pericardial effusion
ZJ1501-S14	14	+	+	+	+	+	+	-	-	-	+	Lung
ZJ10021-S14	14	+	+	+	-	+	+	+	+	-	-	Lung
ZJ1022-S14	14	+	+	+	-	+	+	+	+	-	-	Lung
ZJ1420-S14	14	+	+	+	-	+	+	+	+	-	-	Lung
ZJ15141-S14	14	+	+	+	-	+	+	+	+	-	-	Lung
ZJ1520-S14	14	+	+	+	-	+	+	+	+	-	-	Lung
ZJ1613-S14	14	+	+	+	-	+	+	+	+	-	-	Lung
ZJ1623-S14	14	+	+	+	-	+	+	+	+	-	-	Lung
ZJ1521-S14	14	+	+	+	+	+	+	+	+	-	-	Lung
ZJ1605-S14	14	+	+	+	+	+	+	+	+	+	-	Lung
ZJ10151-Su	Su	+	+	+	-	+	+	-	-	-	-	Seroperitoneum
ZJ1111-Su	Su	-	-	-	-	-	-	-	-	-	-	Spleen
ZJ1104-Su	Su	+	+	+	+	+	+	-	-	-	-	Spleen
ZJ1502-Su	Su	+	+	+	+	+	+	+	+	-	-	Lung
